# Supplementary material
Source: PubMed Central journal article supplement (PMC10436367)
Supplement: tg3c00005_si_001.pdf [file tg3c00005_si_001.pdf]

## Supporting Information

### Multiplex Assays Enable Simultaneous Detection and Identification of SARS-CoV-2 Variants of Concern in Clinical and Wastewater Samples

Yanming Liu,<sup>1</sup> Teresa Kumblathan,<sup>1</sup> Michael A. Joyce,<sup>2</sup> D. Lorne Tyrrell,<sup>2</sup> Graham  
Tipples,<sup>2,3</sup> Xiaoli Pang,<sup>3,4</sup> Xing-Fang Li,<sup>1\*</sup> X. Chris Le<sup>1\*</sup>

- 1 Division of Analytical and Environmental Toxicology, Department of Laboratory  
Medicine and Pathology, Faculty of Medicine and Dentistry, University of Alberta,  
Edmonton, Alberta, Canada T6G 2G3
- 2 Li Ka Shing Institute of Virology, Department of Medical Microbiology and  
Immunology, Faculty of Medicine and Dentistry, University of Alberta, Edmonton,  
Alberta, Canada T6G 2E1
- 3 Provincial Laboratory for Public Health, Alberta Precision Laboratories, University of  
Alberta Hospitals, 8440-112 St, Edmonton, Alberta, Canada T6G 2J2
- 4 Department of Laboratory Medicine and Pathology, Faculty of Medicine and  
Dentistry, University of Alberta, Edmonton, Alberta, Canada T6G 2G3

\* Corresponding authors. [xc.le@ualberta.ca](mailto:xc.le@ualberta.ca) and [xingfang.li@ualberta.ca](mailto:xingfang.li@ualberta.ca)

Number of Tables: 9

Number of Figures: 3

## Table of Contents

Table S1. Amino acid changes in the spike protein of variants of concern (VOCs) designated by the World Health Organization (WHO)

Table S2. Optimal RT-qPCR conditions for the singleplex and multiplex assays for the detection of five targets: HV69/70 deletion and K417N, K417T, T478K and P681R mutations

Table S3. Performance comparison of five targets between singleplex and multiplex RT-qPCR assays

Table S4. Analytical sensitivity of the ABG multiplex RT-qPCR assay for the detection of the Alpha, Beta, and Gamma variants of SARS-CoV-2

Table S5. Analytical sensitivity of the Delta multiplex RT-qPCR assay for the detection of the Delta variant

Table S6. Results of repeated analysis of each target at different concentrations using two multiplex RT-qPCR assays

Table S7. Testing of the Omicron variant in RNA extracted from nasopharyngeal swab samples (clinical samples provided by Alberta Precision Laboratories)

Table S8. Testing of the Delta variant in RNA extracted from nasopharyngeal swab and throat swab samples from patients. Swab samples were collected at a COVID Assessment Site (provided by Alberta Precision Laboratories)

Table S9. Detection of the Alpha, Beta, and Gamma variants in wastewater samples from Calgary and Edmonton, Alberta, Canada

Figure S1. Standard curves of targets HV69/70 deletion and K417N and K417T mutations using the singleplex RT-qPCR assays (left figures) and the ABG multiplex RT-qPCR assay (right figures).

Figure S2. Standard curves of targets T478K and P681R using the singleplex RT-qPCR assays (left figures) and the Delta multiplex RT-qPCR assay (right figures).

Figure S3. Variants of concern COVID-19 cases in Alberta by day reported by Alberta Health Services (AHS) (<https://www.alberta.ca/stats/covid-19-alberta-statistics.htm#variants-of-concern>)

**Table S1.** Amino acid changes in the spike protein of variants of concern (VOCs) designated by the World Health Organization (WHO)

| WHO label (Lineage)                                    | Position of mutated amino acids in Spike protein*                                                                           |                                                                                                                                                                         |
|--------------------------------------------------------|-----------------------------------------------------------------------------------------------------------------------------|-------------------------------------------------------------------------------------------------------------------------------------------------------------------------|
| <b>Alpha</b><br>(B.1.1.7 and<br>descendent lineages)   | <b>HV69/70 del</b> , Y114 del, N501Y, A570D, D614G, P681H, T716I, S982A,<br>D1118H<br><b><u>E484K, L452R</u></b>            |                                                                                                                                                                         |
| <b>Beta</b><br>(B.1.351 and<br>descendent lineages)    | D80A, D215G, L242-L244del, <b>K417N</b> , E484K, N501Y, D614G, A701V,<br><b><u>L18F</u></b>                                 |                                                                                                                                                                         |
| <b>Gamma</b><br>(P.1 and<br>descendent lineages)       | L18F, T20N, P26S, D138Y, R190S, <b>K417T</b> , E484K, N501Y, D614G,<br>H655Y, T1027I, V1176F, <b><u>P681H</u></b>           |                                                                                                                                                                         |
| <b>Delta</b><br>(B.1.617.2 and<br>descendent lineages) | T19R, E156-F157del, R158G, L452R, <b>T478K</b> , D614G, <b>P681R</b> , D950N,<br><b><u>T417N (in delta plus), E484K</u></b> |                                                                                                                                                                         |
| <b>Omicron</b><br>(B.1.1.529)                          | <b>Common<br/>mutations<br/>of BA.1 to<br/>BA.5</b>                                                                         | G142D, G339D, S375F, <b>K417N</b> , N440K, S373P, S477N, <b>T478K</b> , E484A,<br>Q493K, Q498R, N501Y, Y505H, D614G, H655Y, N679K, P681H,<br>N764K, D796Y, Q954H, N969K |
|                                                        | <b>Unique<br/>mutations of<br/>BA.1</b>                                                                                     | A67V, <b>HV69/70 del</b> , T95I, Δ143-145 del, N211del, L212I, ins214EPE,<br>S371L, G446S, G496S, T547K, N856K, L981F                                                   |
|                                                        | <b>Unique<br/>mutation of<br/>BA.2</b>                                                                                      | T19I, LPPA24S, V213G, S371F, T376A, D405N, R408S                                                                                                                        |
|                                                        | <b>BA.3</b>                                                                                                                 | <b>A67V, HV69/70 del, T95I, Δ143-145, Δ211, L212I, G446S, S371F, D405N</b><br>(share 7 unique mutations with BA.1 and 2 with BA.2)                                      |
|                                                        | <b>BA.4</b>                                                                                                                 | <b>BA.2 + HV69/70 del, L452R, F486V, Q493 reversion</b>                                                                                                                 |
|                                                        | <b>BA.5</b>                                                                                                                 | <b>BA.2 + HV69/70 del, L452R, F486V, Q493 reversion</b>                                                                                                                 |

\* Mutations shown in **bold** and underlined are only found in descendent lineages. Mutations chosen as targets in multiplex RT-qPCR assays are shown in **bold** and **red color**. Mutations in **green color** indicate unique mutations shared by Omicron sub-variants BA.1 and BA.3. Mutations in **purple color** are unique mutations shared by Omicron sub-variants BA.2 and BA.3. Mutations in **blue color** are additional mutations shared by Omicron sub-variants BA.4 and BA.5 relative to BA.2. All the information in the table was adapted from WHO (<https://www.who.int/en/activities/tracking-SARS-CoV-2-variants/>) and GISAID (<https://www.gisaid.org/>)

**Table S2.** Optimal RT-qPCR conditions for singleplex and multiplex assays for the detection of five targets: HV69/70 deletion, and K417N, K417T, T478K, and P681R mutations

| Target                  | Singleplex RT-qPCR |               |            |                    | Assay | Multiplex RT-qPCR |               |            |                    |
|-------------------------|--------------------|---------------|------------|--------------------|-------|-------------------|---------------|------------|--------------------|
|                         | F-primer (nM)      | R-primer (nM) | Probe (nM) | Annealing T (°C) * |       | F-primer (nM)     | R-primer (nM) | Probe (nM) | Annealing T (°C) * |
| <b>HV69/70 deletion</b> | 100                | 800           | 250        | 61                 |       | 100               | 800           | 250        |                    |
| <b>K417N</b>            | 100                | 800           | 500        | 60                 | ABG   | 100               | 800           | 500        | 61                 |
| <b>K417T</b>            | 100                | 800           | 500        | 60                 |       | 100               | 800           | 500        |                    |
| <b>T478K</b>            | 400                | 800           | 250        | 64                 | Delta | 400               | 800           | 250        | 64                 |
| <b>P681R</b>            | 200                | 800           | 250        | 60                 |       | 100               | 800           | 250        |                    |

\*T represents temperature.

**Table S3.** Performance comparison between singleplex and multiplex RT-qPCR assays for the five targets

| <b>Target</b>                | <b>Template (Copies)</b>                | <b>10<sup>2</sup><br/>(Ct value)</b> | <b>10<sup>4</sup><br/>(Ct value)</b> | <b>10<sup>6</sup><br/>(Ct value)</b> |
|------------------------------|-----------------------------------------|--------------------------------------|--------------------------------------|--------------------------------------|
| <b>HV 69/70<br/>deletion</b> | Singleplex Ct                           | 34.65                                | 27.92                                | 20.62                                |
|                              | Multiplex (ABG) Ct                      | 34.61                                | 27.48                                | 19.82                                |
|                              | <b>ΔCt value (single Ct - multi Ct)</b> | <b>0.04</b>                          | <b>0.44</b>                          | <b>0.8</b>                           |
| <b>K417N</b>                 | Singleplex Ct                           | 34.66                                | 26.77                                | 20.10                                |
|                              | Multiplex (ABG) Ct                      | 34.50                                | 26.40                                | 19.21                                |
|                              | <b>ΔCt value</b>                        | <b>0.16</b>                          | <b>0.33</b>                          | <b>0.89</b>                          |
| <b>K417T</b>                 | Singleplex Ct                           | 33.73                                | 26.90                                | 20.47                                |
|                              | Multiplex (ABG) Ct                      | 34.15                                | 27.21                                | 19.97                                |
|                              | <b>ΔCt value</b>                        | <b>-0.42</b>                         | <b>-0.31</b>                         | <b>0.5</b>                           |
| <b>T478K</b>                 | Singleplex Ct                           | 33.53                                | 26.32                                | 18.99                                |
|                              | Multiplex (delta) Ct                    | 32.72                                | 25.54                                | 18.75                                |
|                              | <b>ΔCt value</b>                        | <b>0.81</b>                          | <b>0.78</b>                          | <b>0.24</b>                          |
| <b>P681R</b>                 | Singleplex Ct                           | 33.78                                | 26.08                                | 19.35                                |
|                              | Multiplex (delta) Ct                    | 32.89                                | 25.99                                | 19.20                                |
|                              | <b>ΔCt value</b>                        | <b>0.89</b>                          | <b>0.09</b>                          | <b>0.15</b>                          |

ΔCt between singleplex and multiplex assays was <1 for all five targets and three template concentrations, suggesting that both the singleplex and multiplex assays perform similarly.

**Table S4.** Analytical sensitivity of the ABG multiplex RT-qPCR assay for the detection of the Alpha, Beta, and Gamma variants of SARS-CoV-2

| RNA                    | Copies for each variant RNA per reaction | Average Ct (SD) <sup>a</sup> |                 |                 | Detected/tested (%)      |                         |                         |
|------------------------|------------------------------------------|------------------------------|-----------------|-----------------|--------------------------|-------------------------|-------------------------|
|                        |                                          | HV69/70 deletion (Alpha)     | K417N (Beta)    | K417T (Gamma)   | HV69/70 deletion (Alpha) | K417N (Beta)            | K417T (Gamma)           |
| Alpha<br>Beta<br>Gamma | 250                                      | 30.15<br>(0.36)              | 32.07<br>(0.62) | 32.47<br>(0.09) | 6/6<br>(100%)            | 6/6<br>(100%)           | 6/6<br>(100%)           |
|                        | 125                                      | 31.12<br>(0.18)              | 32.65<br>(0.68) | 33.81<br>(0.54) | 6/6<br>(100%)            | 6/6<br>(100%)           | 6/6<br>(100%)           |
|                        | 62                                       | 32.23<br>(0.08)              | 33.98<br>(0.42) | 35.30<br>(0.14) | 6/6<br>(100%)            | 6/6<br>(100%)           | 6/6<br>(100%)           |
|                        | 31                                       | 33.45<br>(0.39)              | 34.39<br>(0.50) | 35.38<br>(0.93) | 6/6<br>(100%)            | 6/6<br>(100%)           | 6/6<br>(100%)           |
|                        | 16                                       | 33.57<br>(0.13)              | 35.97<br>(0.84) | 37.82<br>(0.48) | 6/6<br>(100%)            | 6/6<br>(100%)           | 6/6<br>(100%)           |
|                        | 8                                        | 34.15<br>(0.67)              | 37.14<br>(0.48) | 38.55<br>(0.90) | 10/10<br>(100%)          | <b>10/10<br/>(100%)</b> | <b>10/10<br/>(100%)</b> |
|                        | 4                                        | 36.67<br>(1.1)               | 37.80<br>(1.07) | 38.91<br>(0.98) | <b>10/10<br/>(100%)</b>  | 9/10<br>(90%)           | 9/10<br>(90%)           |

<sup>a</sup> SD denotes one standard deviation.

The results in **red color** indicate the limit of detection (LOD) for the three targets. The LOD was defined as the lowest RNA copy number detected in all 10 replicates. The LOD for detecting Alpha (HV 69/70 deletion) was 4 copies of RNA per reaction. The LOD for detecting Beta (K417N) and Gamma (K417T) was 8 copies of RNA per reaction.

**Table S5.** Analytical sensitivity of the Delta multiplex RT-qPCR assay for the detection of the Delta variant

| RNA   | Copies/<br>reaction | Average Ct<br>(SD) <sup>a</sup> |                 | Detected/tested (%) |                     |
|-------|---------------------|---------------------------------|-----------------|---------------------|---------------------|
|       |                     | T478K                           | P681R           | T478K               | P681R               |
| Delta | <b>250</b>          | 33.87<br>(0.24)                 | 34.21<br>(0.16) | 6/6 (100%)          | 6/6 (100%)          |
|       | <b>125</b>          | 34.70<br>(0.44)                 | 35.13<br>(0.47) | 6/6 (100%)          | 6/6 (100%)          |
|       | <b>62.5</b>         | 35.58<br>(0.69)                 | 36.00<br>(0.38) | 6/6 (100%)          | 6/6 (100%)          |
|       | <b>31</b>           | 36.10<br>(0.45)                 | 36.71<br>(0.52) | 6/6 (100%)          | 6/6 (100%)          |
|       | <b>16</b>           | 36.73<br>(0.60)                 | 37.05<br>(0.34) | <b>10/10 (100%)</b> | <b>10/10 (100%)</b> |
|       | <b>8</b>            | 38.55<br>(1.00)                 | 38.64<br>(0.98) | 4/10 (40%)          | 4/10 (40%)          |

<sup>a</sup> SD denotes one standard deviation.

The results in **red color** indicate the limit of detection (LOD). The LOD was defined as the lowest RNA concentration detected in all 10 replicates. The LOD for detecting the Delta target with either the T458K or P681R mutation was 16 copies of RNA per reaction.

**Table S6.** Results of repeated analyses of each target at different concentrations using two multiplex RT-qPCR assays

| Assay                      | Target                      | Copies/<br>reaction | Intra-assay variability |                 |                  | Inter-assay variability |      |      |
|----------------------------|-----------------------------|---------------------|-------------------------|-----------------|------------------|-------------------------|------|------|
|                            |                             |                     | Ct value<br>(mean)      | SD <sup>a</sup> | %CV <sup>b</sup> | Ct value<br>(mean)      | SD   | %CV  |
| <b>ABG<br/>multiplex</b>   | <b>HV69/70<br/>deletion</b> | 5×10 <sup>4</sup>   | 21.43                   | 0.14            | 0.6              | 21.48                   | 0.01 | 1.15 |
|                            |                             | 8                   | 34.28                   | 0.39            | 1.1              | 34.77                   | 0.67 | 1.9  |
|                            | <b>K417N</b>                | 5×10 <sup>4</sup>   | 24.06                   | 0.18            | 1.8              | 23.58                   | 0.52 | 2.2  |
|                            |                             | 8                   | 36.78                   | 0.10            | 0.3              | 36.88                   | 0.55 | 1.5  |
|                            | <b>K417T</b>                | 5×10 <sup>4</sup>   | 25.21                   | 0.11            | 0.4              | 25.12                   | 0.30 | 1.2  |
|                            |                             | 8                   | 37.30                   | 0.15            | 0.4              | 38.45                   | 0.90 | 2.3  |
| <b>Delta<br/>multiplex</b> | <b>T478K</b>                | 5×10 <sup>4</sup>   | 26.81                   | 0.16            | 0.5              | 26.85                   | 0.31 | 1.1  |
|                            |                             | 16                  | 36.73                   | 0.60            | 1.7              | 37.05                   | 1.00 | 2.7  |
|                            | <b>P681R</b>                | 5×10 <sup>4</sup>   | 27.25                   | 0.16            | 0.6              | 27.42                   | 0.27 | 0.9  |
|                            |                             | 16                  | 35.50                   | 0.34            | 0.9              | 35.86                   | 0.68 | 1.9  |

<sup>a</sup> SD denotes one standard deviation. <sup>b</sup> %CV indicates percent coefficient variation.



**Table S7.** List of Ct values from testing of Omicron sub-variant BA.1 in RNA extracted from nasopharyngeal swab samples. Ct values were obtained using the multiplex ABG assay targeting the HV69/70 deletion and K417N mutation. For comparison, Ct values provided by Alberta Precision Laboratories (APL) were from a multiplex RT-PCR assay targeting the E gene and the HV69/70 mutation and N501Y mutation in the S gene.

| Sample number | HV69/70 deletion | K417N | E gene | HV69/70 deletion | N501Y |
|---------------|------------------|-------|--------|------------------|-------|
|               | This study       |       |        | Provided by APL  |       |
| 1             | 21.82            | 23.39 | 21.16  | 22.46            | 21.70 |
| 2             | 37.00            | 37.30 | 35.66  | 37.20            | 35.87 |
| 3             | 36.03            | 37.67 | 34.59  | 36.69            | 34.42 |
| 4             | 27.99            | 28.94 | 27.61  | 29.37            | 28.30 |
| 5             | 29.32            | 30.66 | 29.47  | 31.02            | 29.99 |
| 6             | 30.49            | 31.15 | 30.11  | 31.82            | 30.75 |
| 7             | 28.71            | 30.51 | 27.25  | 28.94            | 27.91 |
| 8             | 37.97            | 38.00 | 35.77  | 38.57            | 36.63 |
| 9             | 36.25            | 37.28 | 34.79  | 36.31            | 34.61 |
| 10            | 35.54            | 35.27 | 33.66  | 35.00            | 33.55 |
| 11            | 25.45            | 27.06 | 24.91  | 26.16            | 25.29 |
| 12            | 25.18            | 25.23 | 24.63  | 25.90            | 24.94 |
| 13            | 26.56            | 26.93 | 25.66  | 27.02            | 25.95 |
| 14            | 32.91            | 32.40 | 31.17  | 32.49            | 31.11 |
| 15            | 21.81            | 20.62 | 19.52  | 20.96            | 20.19 |
| 16            | 23.14            | 21.08 | 20.22  | 21.63            | 20.85 |
| 17            | 20.67            | 19.52 | 18.74  | 20.00            | 19.40 |
| 18            | 25.92            | 26.50 | 23.78  | 24.95            | 24.06 |
| 19            | 36.53            | 38.45 | 35.73  | 36.79            | 36.01 |
| 20            | 31.13            | 32.07 | 32.68  | 34.11            | 32.76 |
| 21            | 26.23            | 26.64 | 23.99  | 25.46            | 24.46 |
| 22            | 23.50            | 24.34 | 21.84  | 23.12            | 22.31 |
| 23            | 37.08            | 37.16 | 35.81  | 37.85            | 36.58 |
| 24            | 27.64            | 27.37 | 26.53  | 28.00            | 26.92 |
| 25            | 26.18            | 26.08 | 23.77  | 25.21            | 24.00 |
| 26            | 21.98            | 22.86 | 20.31  | 21.58            | 20.79 |
| 27            | 26.63            | 26.67 | 24.64  | 26.19            | 25.18 |
| 28            | 31.80            | 32.57 | 29.76  | 31.46            | 30.36 |
| 29            | 36.94            | 37.20 | 35.07  | 36.89            | 35.14 |
| 30            | 39.97            | 40.00 | 41.23  | 38.91            | 37.01 |
| 31            | 35.82            | 37.68 | 35.21  | 37.27            | 35.65 |
| 32            | 33.85            | 34.90 | 32.91  | 34.62            | 32.84 |
| 33            | 31.41            | 32.85 | 31.10  | 32.89            | 31.41 |
| 34            | 32.63            | 35.32 | 32.61  | 33.97            | 32.91 |
| 35            | 34.67            | 36.03 | 33.81  | 35.29            | 34.23 |
| 36            | 23.76            | 24.39 | 22.52  | 23.58            | 22.83 |
| 37            | 26.73            | 26.92 | 25.58  | 27.19            | 26.15 |
| 38            | 32.30            | 32.77 | 30.78  | 32.70            | 31.62 |
| 39            | 29.41            | 30.97 | 28.56  | 30.40            | 29.21 |
| 40            | 36.80            | 37.66 | 42.07  | 38.71            | 36.86 |
| 41            | 35.82            | 36.54 | 34.63  | 36.17            | 34.89 |
| 42            | 31.05            | 31.85 | 29.80  | 32.03            | 30.84 |

|    |              |              |       |              |       |
|----|--------------|--------------|-------|--------------|-------|
| 43 | <b>30.23</b> | <b>31.71</b> | 30.74 | <b>32.04</b> | 30.97 |
| 44 | <b>23.43</b> | <b>22.75</b> | 21.73 | <b>23.13</b> | 22.09 |
| 45 | <b>22.82</b> | <b>22.82</b> | 21.32 | <b>22.66</b> | 21.66 |
| 46 | <b>28.34</b> | <b>27.67</b> | 26.91 | <b>28.38</b> | 27.11 |
| 47 | <b>21.85</b> | <b>21.58</b> | 20.27 | <b>21.52</b> | 20.71 |
| 48 | <b>23.48</b> | <b>23.63</b> | 22.64 | <b>24.01</b> | 23.15 |
| 49 | <b>28.95</b> | <b>29.18</b> | 27.59 | <b>29.18</b> | 28.15 |
| 50 | <b>34.51</b> | <b>34.25</b> | 33.99 | <b>35.29</b> | 33.99 |
| 51 | <b>22.06</b> | <b>22.00</b> | 20.88 | <b>22.16</b> | 21.45 |
| 52 | <b>23.01</b> | <b>22.76</b> | 21.80 | <b>23.11</b> | 22.24 |
| 53 | <b>24.55</b> | <b>23.95</b> | 23.28 | <b>24.61</b> | 23.66 |
| 54 | <b>23.96</b> | <b>23.87</b> | 22.68 | <b>24.15</b> | 23.17 |
| 55 | <b>20.82</b> | <b>20.28</b> | 18.99 | <b>20.08</b> | 19.35 |
| 56 | <b>27.01</b> | <b>26.80</b> | 25.65 | <b>27.12</b> | 26.04 |
| 57 | <b>28.64</b> | <b>29.34</b> | 27.57 | <b>29.47</b> | 28.35 |
| 58 | <b>34.18</b> | <b>35.77</b> | 34.38 | <b>36.24</b> | 35.10 |
| 59 | <b>27.29</b> | <b>28.81</b> | 26.69 | <b>28.38</b> | 27.24 |
| 60 | <b>19.82</b> | <b>20.23</b> | 18.47 | <b>19.78</b> | 18.92 |
| 61 | <b>30.08</b> | <b>34.87</b> | 34.39 | <b>35.78</b> | 34.20 |
| 62 | <b>30.12</b> | <b>29.24</b> | 34.91 | <b>36.22</b> | 34.71 |
| 63 | <b>23.03</b> | <b>22.86</b> | 21.67 | <b>23.08</b> | 22.21 |
| 64 | <b>25.43</b> | <b>25.32</b> | 24.43 | <b>25.70</b> | 24.85 |
| 65 | <b>21.91</b> | <b>20.94</b> | 20.15 | <b>21.52</b> | 20.82 |
| 66 | <b>35.40</b> | <b>35.87</b> | 34.42 | <b>36.98</b> | 35.35 |
| 67 | <b>30.10</b> | <b>31.91</b> | 31.67 | <b>33.19</b> | 32.18 |
| 68 | <b>27.85</b> | <b>28.00</b> | 27.51 | <b>29.23</b> | 28.04 |
| 69 | <b>23.69</b> | <b>23.29</b> | 22.33 | <b>23.52</b> | 22.84 |
| 70 | <b>20.48</b> | <b>20.93</b> | 19.55 | <b>20.77</b> | 20.00 |
| 71 | <b>21.14</b> | <b>21.13</b> | 20.07 | <b>21.07</b> | 20.41 |
| 72 | <b>23.53</b> | <b>23.08</b> | 22.12 | <b>23.48</b> | 22.66 |
| 73 | <b>31.39</b> | <b>30.79</b> | 30.70 | <b>31.99</b> | 30.99 |
| 74 | <b>24.34</b> | <b>23.75</b> | 22.94 | <b>24.45</b> | 23.63 |
| 75 | <b>26.44</b> | <b>26.23</b> | 25.00 | <b>26.52</b> | 25.71 |
| 76 | <b>30.45</b> | <b>31.13</b> | 29.21 | <b>30.95</b> | 29.88 |
| 77 | <b>21.69</b> | <b>22.43</b> | 19.08 | <b>20.86</b> | 19.96 |
| 78 | <b>38.31</b> | <b>39.00</b> | 36.67 | <b>38.57</b> | 36.42 |
| 79 | <b>33.84</b> | <b>33.95</b> | 31.60 | <b>33.34</b> | 32.00 |

**Table S8.** List of Ct values from testing of the Delta variant in RNA extracted from nasopharyngeal swab and throat swab samples. Ct values were obtained using the multiplex Delta assay targeting the T478K and P681R mutations. Ct values provided by Alberta Precision Laboratories (APL) were from RT-PCR analysis of the E gene.

| Sample number | Specimen source       | T478K Ct   | P681R Ct | E gene Ct       |
|---------------|-----------------------|------------|----------|-----------------|
|               |                       | This study |          | Provided by APL |
| 1             | COVID Assessment Site | 20.31      | 20.83    | 21.92           |
| 2             | COVID Assessment Site | 18.61      | 19.95    | 19.61           |
| 3             | COVID Assessment Site | 20.82      | 21.73    | 21.49           |
| 4             | COVID Assessment Site | 24.55      | 25.17    | 23.49           |
| 5             | Nasopharyngeal Swab   | 18.96      | 19.21    | 20.09           |
| 6             | COVID Assessment Site | 17.10      | 17.47    | 18.76           |
| 7             | COVID Assessment Site | 21.34      | 21.61    | 22.97           |
| 8             | COVID Assessment Site | 19.09      | 22.02    | 18.84           |
| 9             | Nasopharyngeal Swab   | 31.67      | 33.07    | 31.18           |
| 10            | COVID Assessment Site | 17.70      | 20.59    | 17.31           |
| 11            | Nasopharyngeal Swab   | 16.49      | 18.64    | 16.13           |
| 12            | COVID Assessment Site | 27.88      | 31.09    | 27.51           |
| 13            | Throat                | 23.33      | 24.17    | 24.89           |
| 14            | Throat                | 27.52      | 29.16    | 27.67           |
| 15            | Throat                | 24.26      | 25.28    | 24.96           |
| 16            | Nasopharyngeal Swab   | 28.36      | 28.99    | 30.59           |
| 17            | Nasopharyngeal Swab   | 18.50      | 19.26    | 20.03           |
| 18            | Nasopharyngeal Swab   | 21.42      | 24.10    | 22.89           |
| 19            | Nasopharyngeal Swab   | 17.24      | 19.81    | 16.47           |
| 20            | Nasopharyngeal Swab   | 31.28      | 31.10    | 31.71           |
| 21            | Throat                | 26.74      | 27.61    | 29.99           |
| 22            | Throat                | 25.59      | 26.21    | 28.36           |
| 23            | Nasopharyngeal Swab   | 26.12      | 28.56    | 26.97           |
| 24            | Throat                | 32.37      | 34.62    | 33.05           |
| 25            | COVID Assessment Site | 14.78      | 15.76    | 16.68           |
| 26            | COVID Assessment Site | 29.23      | 30.05    | 32.87           |
| 27            | COVID Assessment Site | 17.21      | 18.31    | 20.35           |
| 28            | Nasopharyngeal Swab   | 17.92      | 18.75    | 21.68           |
| 29            | Nasopharyngeal Swab   | 22.76      | 23.61    | 24.79           |
| 30            | COVID Assessment Site | 21.83      | 22.46    | 22.87           |
| 31            | Throat                | 30.09      | 30.91    | 30.27           |
| 32            | COVID Assessment Site | 23.33      | 25.14    | 24.76           |
| 33            | Nasopharyngeal Swab   | 17.44      | 18.58    | 20.87           |
| 34            | Nasopharyngeal Swab   | 16.66      | 19.2     | 18.55           |
| 35            | Nasopharyngeal Swab   | 35.75      | 36.93    | 34.24           |
| 36            | Nasopharyngeal Swab   | 19.03      | 20.51    | 20.81           |
| 37            | Nasopharyngeal Swab   | 27.56      | 30.34    | 25.75           |
| 38            | Nasopharyngeal Swab   | 17.55      | 16.98    | 18.71           |
| 39            | Nasopharyngeal Swab   | 17.34      | 18.66    | 19.19           |
| 40            | COVID Assessment Site | 17.17      | 18.88    | 20.36           |
| 41            | COVID Assessment Site | 20.51      | 21.64    | 23.78           |
| 42            | Nasopharyngeal Swab   | 16.17      | 17.80    | 16.84           |
| 43            | Nasopharyngeal Swab   | 17.69      | 19.13    | 17.69           |

|    |                       |       |       |       |
|----|-----------------------|-------|-------|-------|
| 44 | Nasopharyngeal Swab   | 18.93 | 20.16 | 21.11 |
| 45 | Nasopharyngeal Swab   | 16.54 | 18.73 | 17.82 |
| 46 | Nasopharyngeal Swab   | 28.43 | 27.13 | 27.62 |
| 47 | Nasopharyngeal Swab   | 29.25 | 30.24 | 26.25 |
| 48 | Nasopharyngeal Swab   | 27.21 | 28.29 | 27.60 |
| 49 | Nasopharyngeal Swab   | 18.79 | 19.73 | 20.57 |
| 50 | Throat                | 21.84 | 24.35 | 26.36 |
| 51 | Nasopharyngeal Swab   | 25.91 | 27.78 | 24.57 |
| 52 | Nasopharyngeal Swab   | 24.81 | 24.56 | 24.79 |
| 53 | COVID Assessment Site | 27.01 | 29.06 | 27.04 |
| 54 | Throat                | 23.23 | 23.19 | 25.24 |
| 55 | Nasopharyngeal Swab   | 18.26 | 20.04 | 17.71 |
| 56 | Nasopharyngeal Swab   | 20.87 | 24.65 | 24.12 |
| 57 | Nasopharyngeal Swab   | 15.94 | 17.75 | 16.19 |
| 58 | Nasopharyngeal Swab   | 29.28 | 30.07 | 29.50 |
| 59 | Nasopharyngeal Swab   | 28.56 | 30.50 | 26.69 |
| 60 | Throat                | 19.82 | 22.45 | 21.62 |
| 61 | Nasopharyngeal Swab   | 22.27 | 23.23 | 21.78 |
| 62 | Nasopharyngeal Swab   | 21.65 | 22.21 | 22.84 |
| 63 | Nasopharyngeal Swab   | 17.56 | 18.93 | 19.35 |
| 64 | Nasopharyngeal Swab   | 14.81 | 15.72 | 15.00 |
| 65 | Nasopharyngeal Swab   | 18.54 | 19.77 | 19.44 |
| 66 | Nasopharyngeal Swab   | 15.56 | 16.44 | 16.49 |
| 67 | Nasopharyngeal Swab   | 19.32 | 21.36 | 18.02 |
| 68 | Throat                | 23.58 | 24.36 | 25.07 |
| 69 | Nasopharyngeal Swab   | 16.99 | 18.65 | 17.71 |
| 70 | Throat                | 28.21 | 28.71 | 30.60 |
| 71 | Throat                | 24.87 | 26.66 | 26.37 |
| 72 | Nasopharyngeal Swab   | 16.37 | 16.00 | 17.98 |
| 73 | Nasopharyngeal Swab   | 15.11 | 16.92 | 14.97 |
| 74 | Nasopharyngeal Swab   | 15.76 | 17.03 | 16.66 |
| 75 | Throat                | 25.45 | 26.05 | 26.20 |
| 76 | COVID Assessment Site | 25.71 | 26.70 | 26.98 |
| 77 | Nasopharyngeal Swab   | 31.98 | 32.06 | 34.58 |
| 78 | Nasopharyngeal Swab   | 33.55 | 33.60 | 33.10 |
| 79 | Nasopharyngeal Swab   | 29.09 | 30.46 | 29.58 |
| 80 | Nasopharyngeal Swab   | 31.64 | 32.08 | 31.44 |
| 81 | Nasopharyngeal Swab   | 20.55 | 20.90 | 21.25 |
| 82 | Nasopharyngeal Swab   | 22.97 | 23.66 | 22.40 |
| 83 | Nasopharyngeal Swab   | 28.96 | 29.90 | 28.35 |
| 84 | Nasopharyngeal Swab   | 18.45 | 18.67 | 18.62 |
| 85 | Nasopharyngeal Swab   | 23.51 | 23.81 | 23.51 |
| 86 | Nasopharyngeal Swab   | 16.83 | 17.26 | 16.66 |
| 87 | Nasopharyngeal Swab   | 17.17 | 17.64 | 17.01 |
| 88 | COVID Assessment Site | 19.78 | 21.57 | 20.50 |

|     |                       |       |       |       |
|-----|-----------------------|-------|-------|-------|
| 89  | COVID Assessment Site | 30.77 | 28.96 | 32.43 |
| 90  | Nasopharyngeal Swab   | 21.74 | 23.18 | 20.37 |
| 91  | Nasopharyngeal Swab   | 31.08 | 31.68 | 29.83 |
| 92  | Nasopharyngeal Swab   | 17.24 | 17.49 | 16.63 |
| 93  | Nasopharyngeal Swab   | 30.73 | 30.91 | 30.67 |
| 94  | Nasopharyngeal        | 24.62 | 24.81 | 22.84 |
| 95  | Nasopharyngeal Swab   | 22.09 | 23.61 | 19.43 |
| 96  | COVID Assessment Site | 18.16 | 19.20 | 17.55 |
| 97  | COVID Assessment Site | 30.84 | 31.56 | 31.93 |
| 98  | Throat                | 22.94 | 22.75 | 24.37 |
| 99  | COVID Assessment Site | 17.87 | 17.55 | 18.51 |
| 100 | Nasopharyngeal Swab   | 17.39 | 17.78 | 18.45 |

<sup>a</sup>All the samples in this table have been confirmed to be Delta variant positive by the Alberta Precision Laboratories using genome sequencing.

**Table S9.** Detection of the Alpha, Beta, and Gamma variants in wastewater samples from Calgary and Edmonton, Alberta, Canada

| <b>Sample (sampling date)</b> | <b>Total SARS-CoV-2 RNA (N1 gene) (copies/100 mL)</b> | <b>Alpha (HV69/70 deletion) (copies/100 mL)</b> | <b>Beta (K417N) (copies/100 mL)</b> | <b>Gamma (K417T) (copies/100 mL)</b> |
|-------------------------------|-------------------------------------------------------|-------------------------------------------------|-------------------------------------|--------------------------------------|
| <b>Calgary</b>                |                                                       |                                                 |                                     |                                      |
| 05/16/21                      | 26153                                                 | 862                                             | N/A                                 | 14                                   |
| 05/20/21                      | 23375                                                 | 761                                             | N/A                                 | N/A                                  |
| 05/23/21                      | 4623                                                  | 310                                             | N/A                                 | N/A                                  |
| 05/27/21                      | 9227                                                  | 440                                             | N/A                                 | N/A                                  |
| 05/30/21                      | 9404                                                  | 235                                             | N/A                                 | N/A                                  |
| 06/03/21                      | 15789                                                 | 218                                             | N/A                                 | 6                                    |
| 06/06/21                      | 7180                                                  | 94                                              | 14                                  | N/A                                  |
| 06/10/21                      | 5074                                                  | 102                                             | N/A                                 | N/A                                  |
| 06/13/21                      | 13215                                                 | 82                                              | 3                                   | 14                                   |
| 06/15/21                      | 5836                                                  | 122                                             | N/A                                 | N/A                                  |
| 06/20/21                      | 5112                                                  | 14                                              | N/A                                 | 67                                   |
| 06/22/21                      | 3138                                                  | 24                                              | N/A                                 | 26                                   |
| <b>Edmonton</b>               |                                                       |                                                 |                                     |                                      |
| 05/16/21                      | 9787                                                  | 120                                             | N/A                                 | N/A                                  |
| 05/20/21                      | 12432                                                 | 142                                             | N/A                                 | 69                                   |
| 05/23/21                      | 8112                                                  | 366                                             | 2                                   | 3                                    |
| 05/27/21                      | 1559                                                  | 18                                              | N/A                                 | 63                                   |
| 05/30/21                      | 1840                                                  | 41                                              | N/A                                 | N/A                                  |
| 06/03/21                      | 3212                                                  | 54                                              | N/A                                 | N/A                                  |
| 06/06/21                      | 2847                                                  | 52                                              | N/A                                 | N/A                                  |
| 06/10/21                      | 733                                                   | 147                                             | 2                                   | N/A                                  |
| 06/13/21                      | 1994                                                  | N/A                                             | N/A                                 | 60                                   |
| 06/15/21                      | 1556                                                  | 21                                              | 2                                   | 5                                    |
| 06/20/21                      | 558                                                   | 5                                               | 28                                  | 4                                    |
| 06/22/21                      | 520                                                   | 5                                               | N/A                                 | N/A                                  |

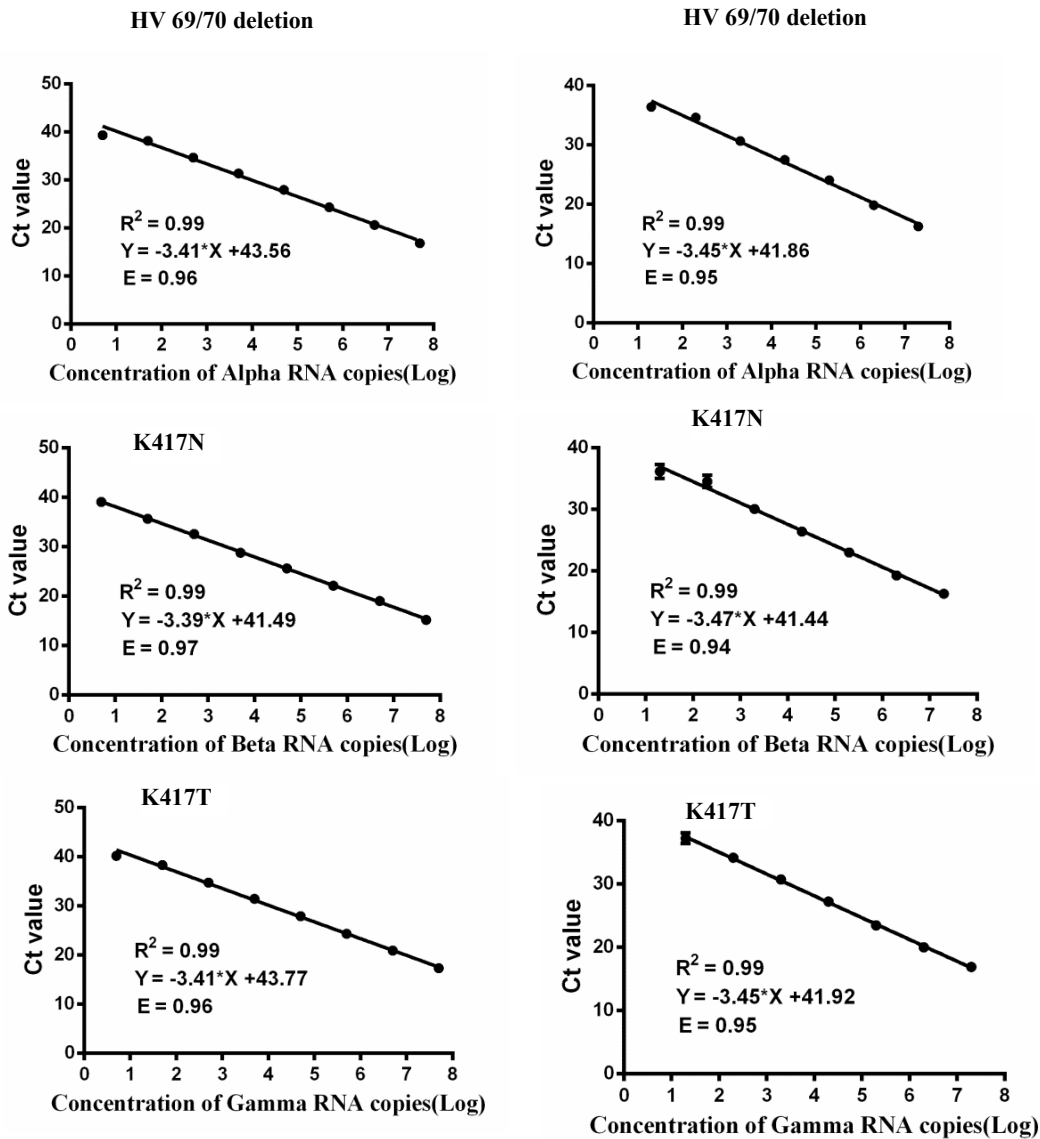

Figure S1. Standard curves of targets HV69/70 deletion and K417N and K417T mutations using singleplex RT-qPCR assays (left figures) and using the ABG multiplex RT-qPCR assay (right figures). The log values of the copies of 10-time diluted pure SARS-CoV-2 variant RNA are plotted against the corresponding Ct values. E represents PCR efficiency which was calculated using the equation:  $E = -1 + 10^{(-1/\text{slope})}$ , where slope refers to the slope of the standard curve. This standard curve was used to quantify the amounts of SARS-CoV-2 variant RNA in the samples.



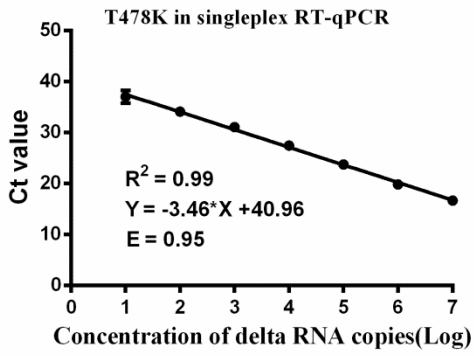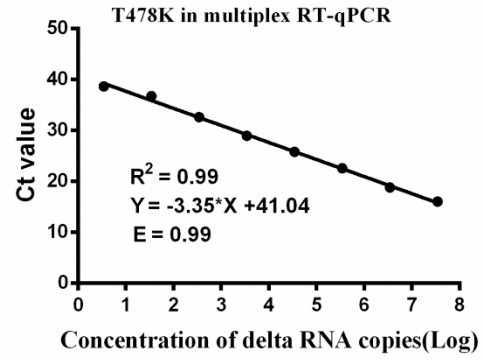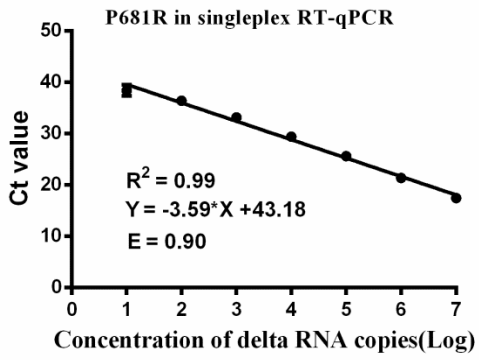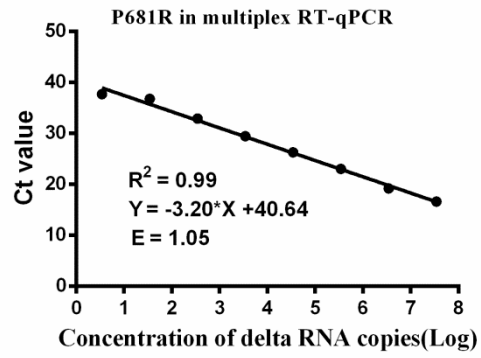

Figure S2. Standard curves of targets T478K and P681R using singleplex RT-qPCR assays (left figures) and using the Delta multiplex RT-qPCR assay (right figures). The log values of the copies of 10-time diluted pure SARS-CoV-2 variant RNA are plotted against the corresponding Ct values. E represents PCR efficiency. This standard curve was used to quantify the amounts of SARS-CoV-2 variant RNA in the samples.

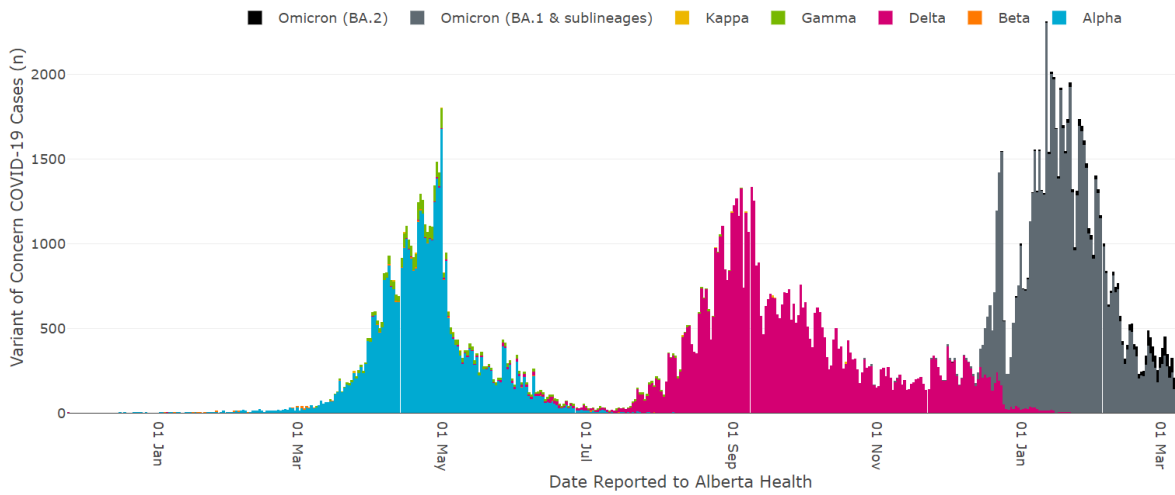

Figure S3. Variants of concern COVID-19 cases in Alberta by day reported by Alberta Health Services (AHS) (<https://www.alberta.ca/stats/covid-19-alberta-statistics.htm#variants-of-concern>)
